# Supplementary material for: Effects of salts on the self-assembly behavior and antibacterial activity of a surfactant-like peptide
Source: Royal Society of Chemistry journal article supplement (doi:10.1039/d0sm01519a), 2020-01-01
Supplement: d0sm01519a1.pdf [file d0sm01519a1.pdf]

***Supporting Information***

Effect of Salts on the Self-Assembly Behavior and Antibacterial  
Activity of a Surfactant-Like Peptide

Cuixia Chen,\* Jiaxi Chen, Qizhi Yu, Jiangyu Zhang, Xiaoya Niu, Liyun Hao, Yuting  
Zhu, Liuxin Yang, Yurong Zhao\*

*Centre for Bioengineering and Biotechnology, China University of Petroleum (East  
China), 66 Changjiang West Road, Qingdao Economic Development Zone, Qingdao  
266555, China*

Correspondence author:

Cuixia Chen: [chencx@upc.edu.cn](mailto:chencx@upc.edu.cn)

Yurong Zhao: [yurongzhao@upc.edu.cn](mailto:yurongzhao@upc.edu.cn)

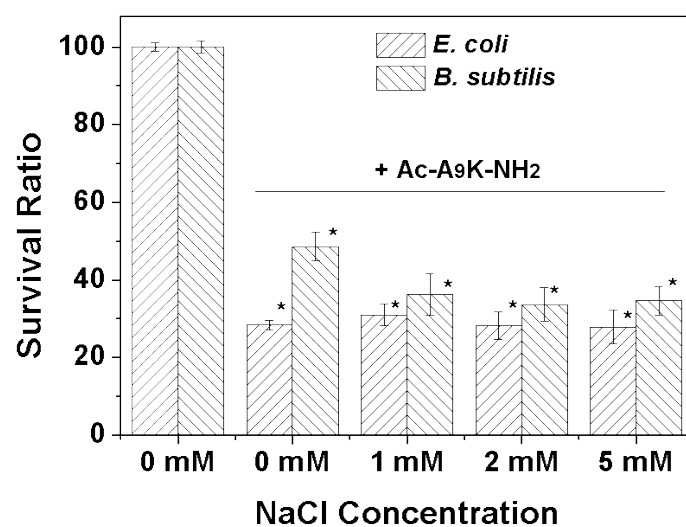

**Figure S1.** The antibacterial activity of 0.1 mM Ac-A<sub>9</sub>K-NH<sub>2</sub> against (a) *E. coli*. and (b) *B. subtilis* at different concentrations of NaCl.

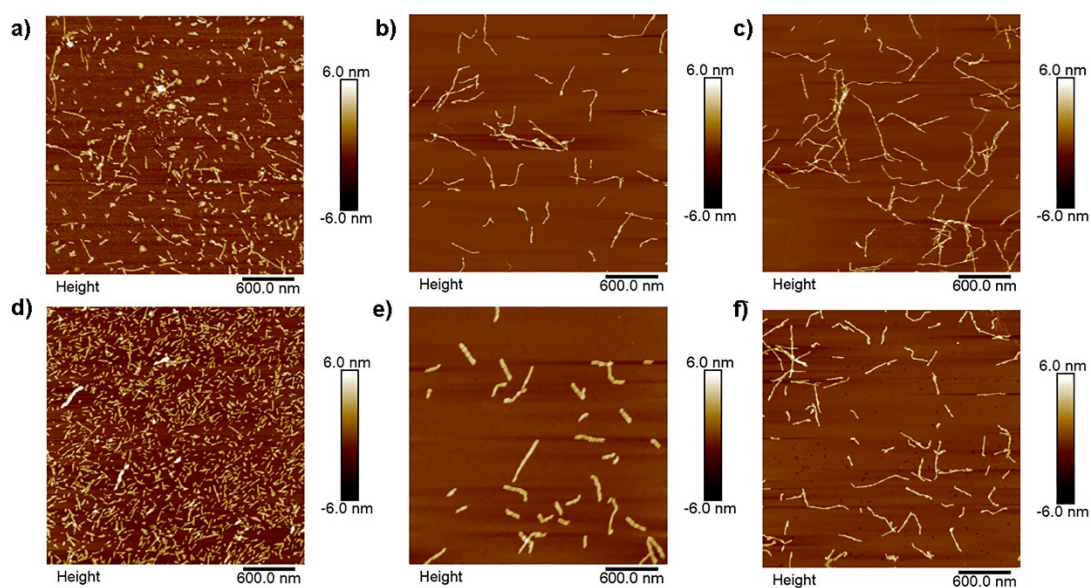

**Figure S2.** AFM height images of Ac-A<sub>9</sub>K-NH<sub>2</sub> in the presence of different salts at varied concentrations: (a) 0.1 mM CaCl<sub>2</sub>, (b) 1 mM CaCl<sub>2</sub>, (c) 2 mM CaCl<sub>2</sub>, (d) 0.1 mM NaCl, (e) 1 mM NaCl, and (f) 2 mM NaCl.

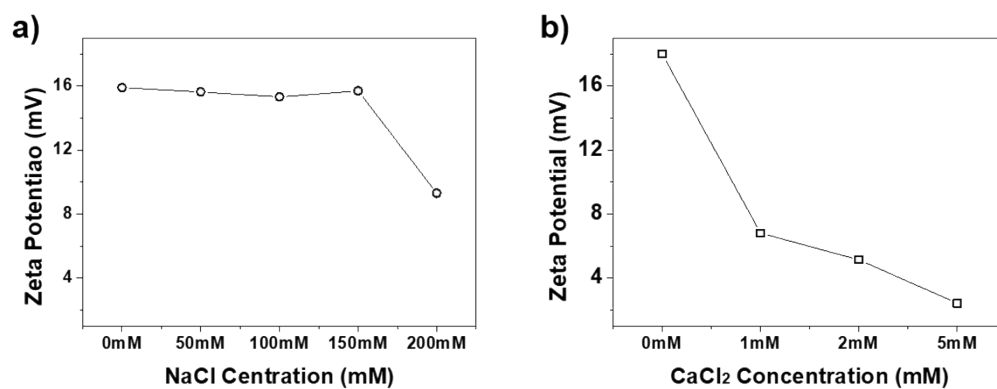

**Figure S3.** Zeta potential of Ac-A<sub>9</sub>K-NH<sub>2</sub> assemblies in the presence of different concentrations of (a) NaCl and (b) CaCl<sub>2</sub>.

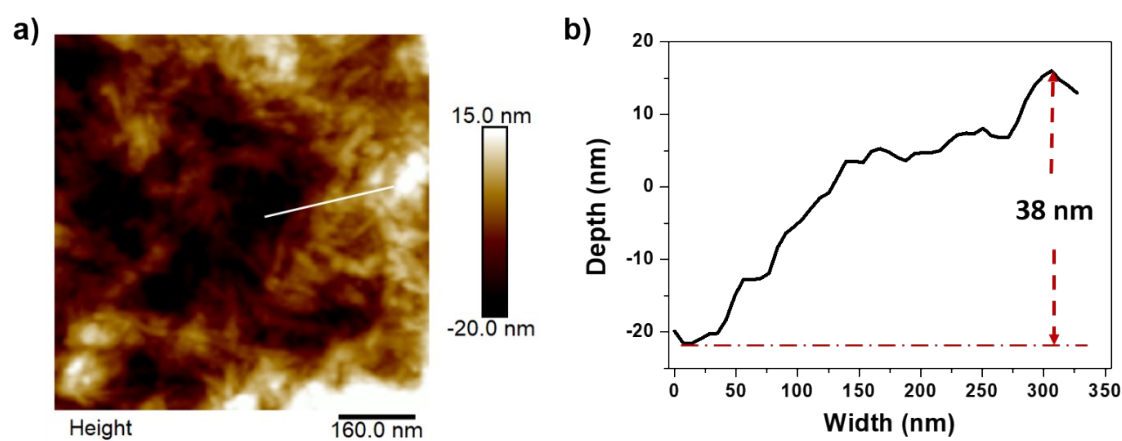

**Figure S4.** AFM height images of *E. coli* surface after incubation with Ac-A<sub>9</sub>K-NH<sub>2</sub> in the presence of 200 mM NaCl. b) Corresponding cross-sectional height profiles indicated in a.

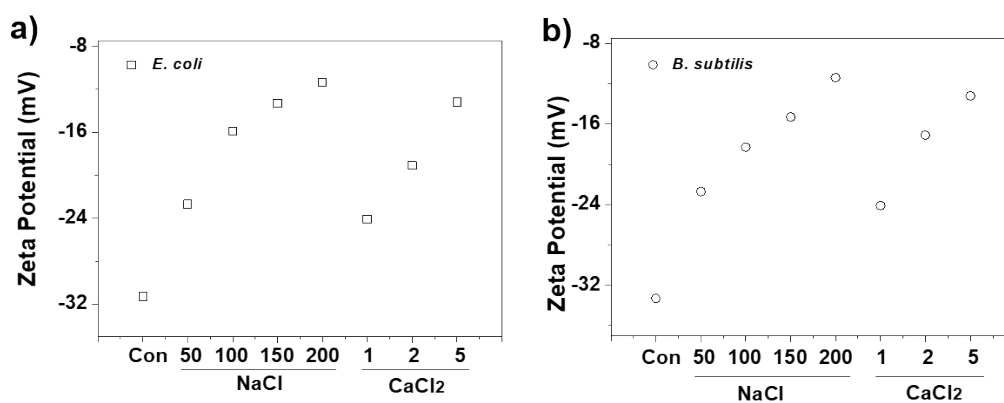

**Figure S5.** Zeta potential of (a) *E. coli* and (b) *B. subtilis* in the presence of different concentrations of NaCl and CaCl<sub>2</sub>.
